# Supplementary material for: Mycobacterium tuberculosis infection drives a type I IFN signature in lung lymphocytes
Source: PubMed Central journal article supplement — Cell Rep. Author manuscript; Available in PMC 2022 Oct 28. (PMC9616001; doi:10.1016/j.celrep.2022.110983), 2022-06-21
Supplement: NIHMS1818168-supplement-1.pdf [file NIHMS1818168-supplement-1.pdf]

Cell Reports, Volume 39

## Supplemental information

***Mycobacterium tuberculosis* infection**

**drives a type I IFN signature**

**in lung lymphocytes**

**Sadia Akter, Kuldeep S. Chauhan, Micah D. Dunlap, José Alberto Choreño-Parra, Lan Lu, Ekaterina Esaulova, Joaquin Zúñiga, Maxim N. Artyomov, Deepak Kaushal, and Shabaana A. Khader**

## Supplementary Information

### ***Mycobacterium tuberculosis* infection drives a Type I IFN signature in lung lymphocytes**

Sadia Akter<sup>1,5</sup>, Kuldeep S. Chauhan<sup>1,5</sup>, Micah D. Dunlap<sup>1</sup>, José Alberto Choreño-Parra<sup>1,2</sup>, Lan Lu<sup>1</sup>, Ekaterina Esaulova<sup>3</sup>, Joaquin Zúñiga<sup>2</sup>, Maxim Artyomov<sup>3</sup>, Deepak Kaushal<sup>4,\*</sup>, Shabaana A. Khader<sup>1,6,\*</sup>

<sup>1</sup>Department of Molecular Microbiology, Washington University School of Medicine in St. Louis, St. Louis, MO 63110, USA.

<sup>2</sup>Laboratory of Immunobiology and Genetics, Instituto Nacional de Enfermedades Respiratorias "Ismael Cosío Villegas," Mexico City 14080, Mexico; Laboratorio de Inmunoquímica I, Posgrado en Ciencias Quimicobiológicas, Escuela Nacional de Ciencias Biológicas, Instituto Politécnico Nacional, Mexico City 07320, Mexico.

<sup>3</sup>Department of Pathology and Immunology, Washington University School of Medicine, St. Louis, MO 63110, USA.

<sup>4</sup>Southwest National Primate Research Center, Texas Biomedical Research Institute, San Antonio, TX 78227, USA.

<sup>5</sup>Equal authorship

<sup>6</sup>Lead Contact

\*Correspondence: [khader@wustl.edu](mailto:khader@wustl.edu) (S.A.K.), [dkaushal@txbiomed.org](mailto:dkaushal@txbiomed.org) (D. K.)

## Supplementary Figure 1

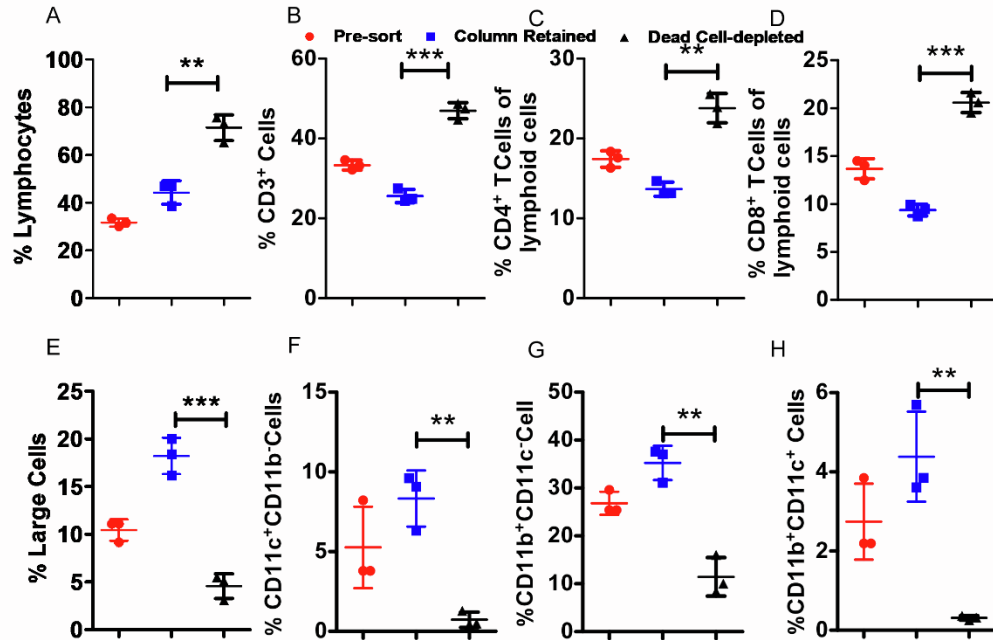

**Fig. S1, related to Fig. 1. Enrichment of lymphoid populations post live cells sorting.** Dead cells were eliminated from the cells derived from mouse lungs using dead cell removal kit. Frequency of lymphoid cells (A-D) and innate immune cell types (E-H) were determined by flow cytometry. Student's t-test was performed to calculate significance (n=3). Data points represent the mean  $\pm$  SD of values. \*p < 0.05, \*\*p < 0.01, \*\*\*p < 0.001, NS = not significant.

## Supplementary Figure 2

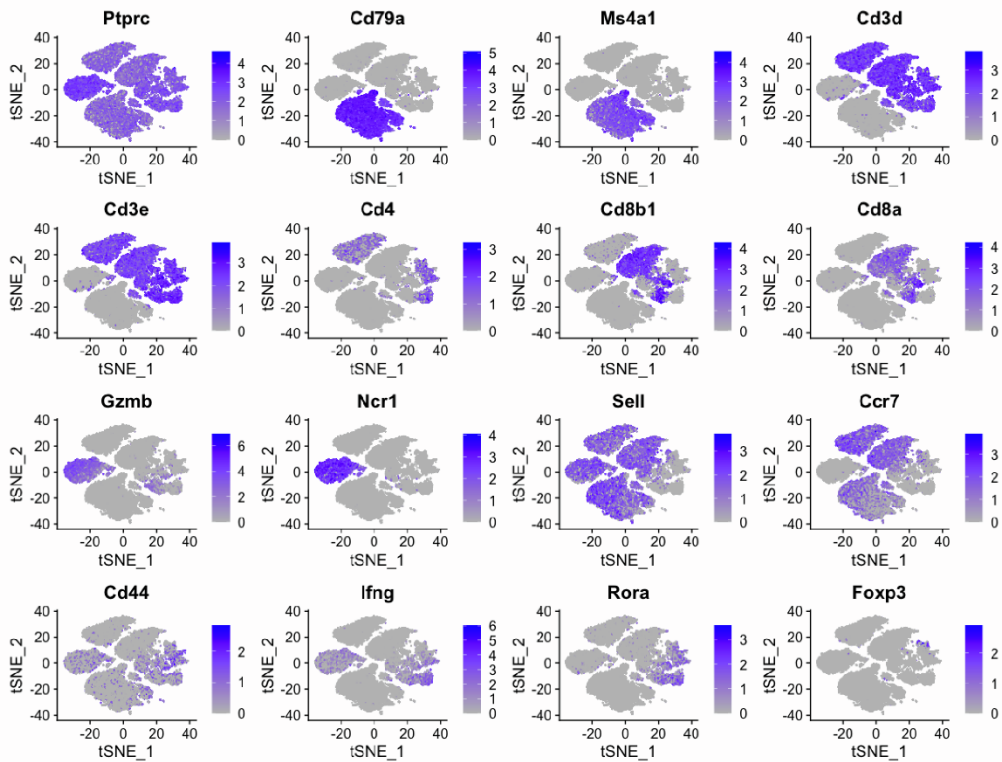

**Fig. S2, related to Fig. 1. tSNE plot with the expression of known cell markers. Un, n=2; D50 Inf, n=3; D100 Inf, n=3. The expression of marker genes was used to characterize distinct clusters according to cell identity.**

# Supplementary Figure 3

A

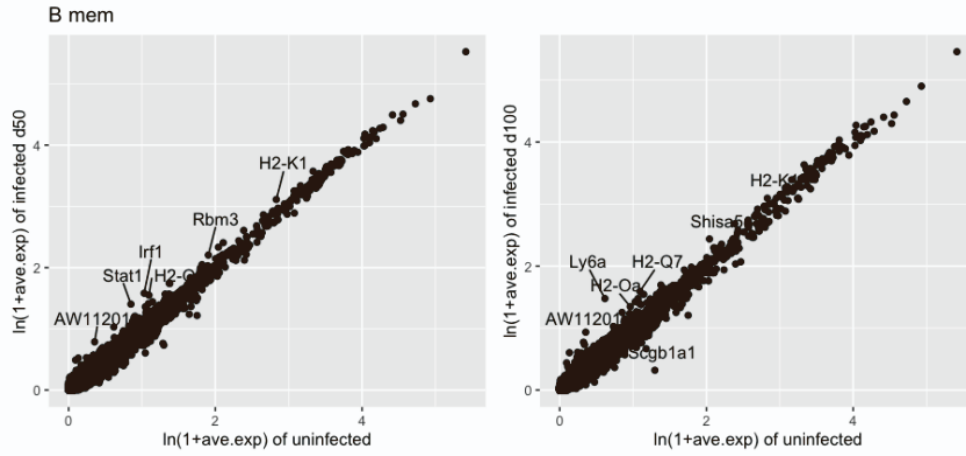

B

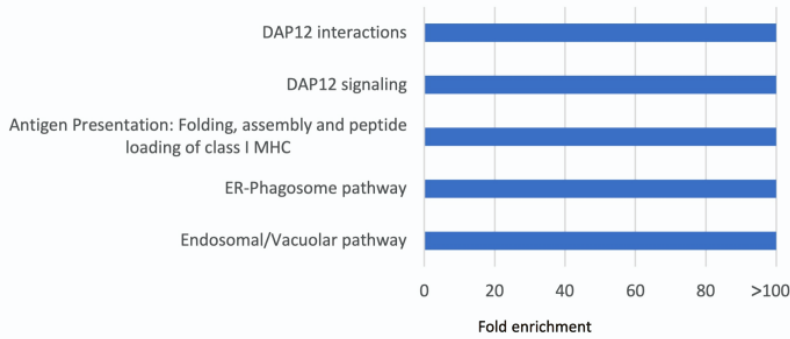

C

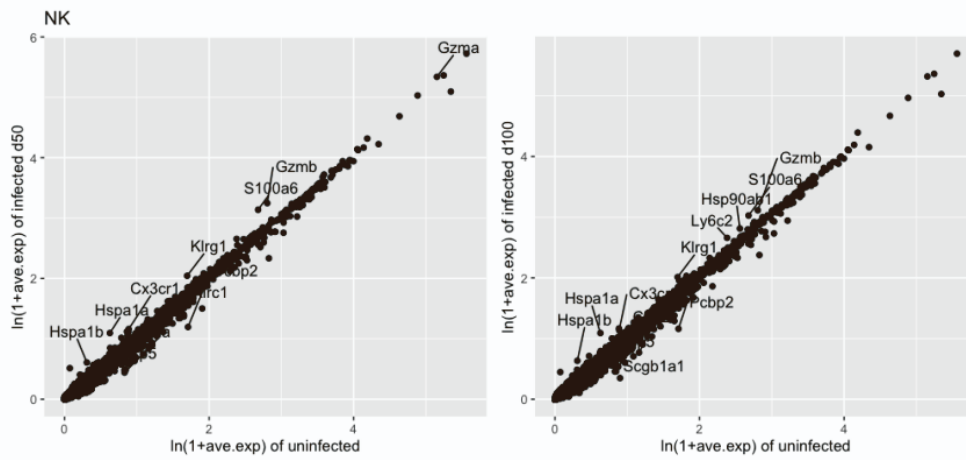

D

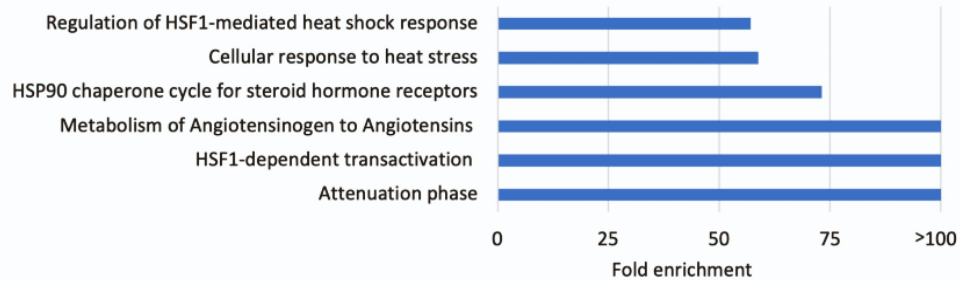

**Fig. S3, related to Fig. 3-4: Transcriptional analysis of B mem and NK cell clusters.**

(A) Scatterplots depicting the comparison of average expression of genes in infected (50/100 dpi) versus uninfected samples in **B mem** cluster, where each dot represents a gene. Top DEGs are highlighted. Adjusted p-value  $\leq 0.05$ . (B) Statistical over-representation test was performed with reactome pathways as annotation set. Top over-represented pathways in *Mtb-infected* mice lungs at 50 dpi with respective fold enrichment in **B mem** cluster. FDR  $< 0.05$ . (C) Scatterplots depicting the comparison of average expression of genes in infected (50/100 dpi) versus uninfected samples in **NK** cluster. Each dot represents a gene, highlighting the top DEGs. Adjusted p-value  $\leq 0.05$ . Each dot represents a gene. (D) Top over-represented reactome pathways in *Mtb-infected* mice lungs at 100 dpi with respective fold enrichment in **NK** cluster. FDR  $< 0.05$ .

**Table S1, related to Fig. 3-4:** Common DEGs across three  $CD4^+$  T clusters ( $CD4^+$  T naive,  $CD4^+$  T IFN $^+$  and  $CD4^+$  T act1) in *Mtb*-infected (50/100 dpi) versus uninfected samples.

| Infected lungs at 50 dpi vs uninfected       |                                            | Infected lungs at 100 dpi vs uninfected      |                                            |
|----------------------------------------------|--------------------------------------------|----------------------------------------------|--------------------------------------------|
| Common in $CD4^+$ T act1 and $CD4^+$ T naive | Common in $CD4^+$ T act1 and $CD4^+$ T IFN | Common in $CD4^+$ T act1 and $CD4^+$ T naive | Common in $CD4^+$ T act1 and $CD4^+$ T IFN |
| Klf3                                         | Klf2                                       | Ppp1r15a                                     | Klf2                                       |
| Foxp1                                        | H2-K1                                      | Hbb-bs                                       | Rps29                                      |
| H2-Q7                                        | B2m                                        | Foxp1                                        | H2-D1                                      |
| Sesn1                                        | H2-D1                                      | Sesn1                                        | Tagap                                      |
| Srsf6                                        | Rasgrp2                                    | Lgals1                                       | Pnrc1                                      |
| Ly6a                                         | Pnrc1                                      | Actg1                                        | AW112010                                   |
| AW112010                                     | Limd2                                      | 1110008F13Rik                                | Ly6a                                       |
| Stat1                                        | Tapbp                                      | Tsc22d3                                      | H2-K1                                      |
| Psmb8                                        | Crlf3                                      | Nr4a1                                        | Rpl35a                                     |
| Igtp                                         | Psmb10                                     | Fam101b                                      | Klf3                                       |
| Ppp1r15a                                     | Ly6a                                       | Foxo1                                        | Psmb8                                      |
| Pcbp2                                        | AW112010                                   | Pdcd4                                        | B2m                                        |
| Ifi47                                        | Stat1                                      | AW112010                                     | Stat1                                      |
| Psmb9                                        | Psmb8                                      | Ly6a                                         | Scgb1a1                                    |
| Gbp2                                         | Igtp                                       | H2-K1                                        | Pcbp2                                      |
| Tgtp2                                        | Ppp1r15a                                   | Rpl35a                                       | Limd2                                      |
| Psme1                                        | Pcbp2                                      | Klf3                                         | Igtp                                       |
| Psme2                                        | Ifi47                                      | Psmb8                                        | H2-Q7                                      |
| Socs3                                        | Psmb9                                      | B2m                                          | Ifi47                                      |
| Zbp1                                         | Gbp2                                       | Stat1                                        | Psmb9                                      |
| Tgtp1                                        | Tgtp2                                      | Scgb1a1                                      | Psme2                                      |
| Irgm1                                        | Psme1                                      | Pcbp2                                        | Gbp2                                       |
| 1110008F13Rik                                | Psme2                                      | Limd2                                        | Foxn3                                      |
|                                              | Socs3                                      | Igtp                                         | Zfp36l2                                    |
|                                              | Zbp1                                       | H2-Q7                                        | Tgtp2                                      |
|                                              | Tgtp1                                      | Ifi47                                        | Socs3                                      |
|                                              | Irgm1                                      | Psmb9                                        | Tgtp1                                      |
|                                              | 1110008F13Rik                              | Psme2                                        | Psmb10                                     |
|                                              |                                            | Gbp2                                         |                                            |
|                                              |                                            | Foxn3                                        |                                            |
|                                              |                                            | Zfp36l2                                      |                                            |
|                                              |                                            | Tgtp2                                        |                                            |
|                                              |                                            | Socs3                                        |                                            |
|                                              |                                            | Tgtp1                                        |                                            |
|                                              |                                            | Psmb10                                       |                                            |

**Table S2, related to Fig. 3-4:** Common DEGs across three *CD8<sup>+</sup> T* clusters (*CD8<sup>+</sup> T naïve*, *CD8<sup>+</sup> T eff* and *CD8<sup>+</sup> T act2*) in *Mtb*-infected (50/100 dpi) versus uninfected samples.

| Infected lungs at 50 dpi vs uninfected mice                     |         | Infected lungs at 100 dpi vs uninfected mice                     |                                                                 |                                                                  |
|-----------------------------------------------------------------|---------|------------------------------------------------------------------|-----------------------------------------------------------------|------------------------------------------------------------------|
| <i>CD8<sup>+</sup> T naïve</i> and <i>CD8<sup>+</sup> T eff</i> |         | <i>CD8<sup>+</sup> T naïve</i> and <i>CD8<sup>+</sup> T act2</i> | <i>CD8<sup>+</sup> T naïve</i> and <i>CD8<sup>+</sup> T eff</i> | <i>CD8<sup>+</sup> T naïve</i> and <i>CD8<sup>+</sup> T act2</i> |
| Ly6a                                                            | Tmed2   | Ly6a                                                             | Ly6a                                                            | Ly6a                                                             |
| Stat1                                                           | Plac8   | Stat1                                                            | Rpl35a                                                          | Rpl35a                                                           |
| Rpl35a                                                          | Tprgl   | Rpl35a                                                           | Stat1                                                           | Stat1                                                            |
| Pcbp2                                                           | Ly6e    | Pcbp2                                                            | Pcbp2                                                           | Pcbp2                                                            |
| AW112010                                                        | Mrpl52  | AW112010                                                         | Scgb1a1                                                         | Scgb1a1                                                          |
| Klf3                                                            | Macf1   | Klf3                                                             | AW112010                                                        | AW112010                                                         |
| H2-K1                                                           | Ucp2    | H2-K1                                                            | Psmb8                                                           | Psmb8                                                            |
| Cd52                                                            | Tagap   | Cd52                                                             | H2-K1                                                           | H2-K1                                                            |
| Klf2                                                            | Crlf3   | Klf2                                                             | Klf3                                                            | Klf3                                                             |
| H2-Q7                                                           | Ets1    | H2-Q7                                                            | Hbb-bs                                                          | Hbb-bs                                                           |
| Atp1b1                                                          | Gadd45g | Atp1b1                                                           | H2-Q7                                                           | H2-Q7                                                            |
| Actn1                                                           | Rac1    | Actn1                                                            | Atp1b1                                                          | Atp1b1                                                           |
| Sesn1                                                           | Cd7     | Sesn1                                                            | Tmem108                                                         | Tmem108                                                          |
| Itga4                                                           | Txnip   | Itga4                                                            | Tprgl                                                           | Tprgl                                                            |
| Vim                                                             |         | Vim                                                              | Ppp1r15a                                                        | Ppp1r15a                                                         |
| Igtp                                                            |         | Psmb8                                                            | Igtp                                                            | Sesn1                                                            |
| Irf1                                                            |         | Ccr9                                                             | Psme2                                                           | Smc4                                                             |
| Tgtp1                                                           |         | Smc4                                                             | B2m                                                             | Ccr9                                                             |
| B2m                                                             |         | Fam101b                                                          | Pla2g16                                                         | Tagap                                                            |
| Psme1                                                           |         | Foxp1                                                            | Pdcd4                                                           | Fam101b                                                          |
| Psme2                                                           |         |                                                                  | 1110008F13Rik                                                   |                                                                  |
| Pdcd4                                                           |         |                                                                  | Zfp36l2                                                         |                                                                  |
| Il7r                                                            |         |                                                                  | Txnip                                                           |                                                                  |
| Zbp1                                                            |         |                                                                  | Anp32b                                                          |                                                                  |
| Tapbp                                                           |         |                                                                  | Ucp2                                                            |                                                                  |
| Anp32b                                                          |         |                                                                  | Tapbp                                                           |                                                                  |
| Actg1                                                           |         |                                                                  | Rac1                                                            |                                                                  |
| 1110008F13Rik                                                   |         |                                                                  | Itga4                                                           |                                                                  |
| Socs3                                                           |         |                                                                  | Crlf3                                                           |                                                                  |
